# Supplementary material for: Hospitalizations Associated With Mental Health Conditions Among Adolescents in the US and France During the COVID-19 Pandemic
Source: PubMed Central journal article supplement (PMC9856226; doi:10.1001/jamanetworkopen.2022.46548), 2022-12-13
Supplement: jamanetwopen-e2246548-s001.pdf [file jamanetwopen-e2246548-s001.pdf]

## Supplementary Online Content

Gutiérrez-Sacristán A, Serret-Larmande A, Hutch MR, et al; Consortium for Clinical Characterization of COVID-19 by EHR (4CE). Hospitalizations associated with mental health conditions among adolescents in the US and France during the COVID-19 pandemic. *JAMA Netw Open*. 2022;5(12):e2246548. doi:10.1001/jamanetworkopen.2022.46548

**eTable 1.** Contributing Children’s Hospitals

**eTable 2.** Changes in the Monthly Proportion of Hospitalizations Across Health Care Sites Between the Reference Prepandemic Period and the Examined Pandemic Period

**eTable 3.** Changes in the Monthly Proportion of Hospitalizations for Selected Mental Health Conditions Across Health Care Sites Between the Reference Prepandemic Period and the Examined Pandemic Period

**eFigure 1.** Number of Hospitalizations per Month

**eFigure 2.** Use of *ICD-10* Codes by Health Care Site

**eFigure 3.** Counts of Patients per Month Stratified by Mental Health Condition

This supplementary material has been provided by the authors to give readers additional information about their work.

**eTable 1. Contributing Children’s Hospitals**

| Country | Children’s Hospitals                                                                                  | City             | Hospitals per healthcare site | Pediatric beds | Pediatric hospitalizations per year | Obfuscation threshold for small counts <sup>1</sup> |
|---------|-------------------------------------------------------------------------------------------------------|------------------|-------------------------------|----------------|-------------------------------------|-----------------------------------------------------|
| France  | Assistance Publique - Hôpitaux de Paris : Hôpital Necker-Enfants Malades and Hôpital Armand Trousseau | Paris            | 2                             | 443; 163       | 18,069; 9,686                       | none                                                |
|         | Centre Hospitalier Universitaire de Bordeaux                                                          | Bordeaux         | 1                             | 280            | 20,889                              | 3                                                   |
| USA     | Boston Children’s Hospital                                                                            | Boston, MA       | 1                             | 404            | 28,000                              | none                                                |
|         | The Children’s Hospital of Philadelphia                                                               | Philadelphia, PA | 1                             | 591            | 25,003                              | none                                                |
|         | Cincinnati Children’s Hospital Medical Center                                                         | Cincinnati, OH   | 1                             | 624            | 17,400                              | none                                                |
|         | C.S. Mott Children’s Hospital                                                                         | Ann Arbor, MI    | 1                             | 346            | 7,814                               | none                                                |
|         | Lurie Children’s Hospital of Chicago                                                                  | Chicago, IL      | 1                             | 360            | 12,000                              | none                                                |

<sup>1</sup> This threshold refers to the minimum patient count that will be reported by a hospital for any variables or outcomes in order to ensure patient privacy.

**eTable 2. Changes in the Monthly Proportion of Hospitalizations Across Health Care Sites Between the Reference Prepandemic Period and the Examined Pandemic Period**

| Healthcare Site                               | Mean change in monthly porportion of hospitalizations (95% CI) |                        | ITS analysis: difference between time periods (95% CI) |
|-----------------------------------------------|----------------------------------------------------------------|------------------------|--------------------------------------------------------|
|                                               | Pre-pandemic period                                            | During pandemic period |                                                        |
| Assistance Publique - Hôpitaux de Paris       | 0.09% (-0.08%–0.26%)                                           | 0.25% (0.02%–0.47%)    | 0.16% (-0.13%–0.44%)                                   |
| Centre Hospitalier Universitaire de Bordeaux  | 0.14% (-0.13%–0.42%)                                           | 0.70% (0.36%–1.04%)    | 0.56% (0.13%–1.01%)                                    |
| Boston Children's Hospital                    | 0.27% (-0.08%–0.62%)                                           | 0.87% (0.45%–1.28%)    | 0.60% (0.05%–1.13%)                                    |
| Cincinnati Children's Hospital Medical Center | -0.03% (-0.29%–0.23%)                                          | 1.06% (0.75%–1.38%)    | 1.09% (0.67%–1.50%)                                    |
| Lurie Children's Hospital of Chicago          | 0.14% (-0.21%–0.49%)                                           | 0.77% (0.34%–1.18%)    | 0.63% (0.08%–1.16%)                                    |
| Children's Hospital of Philadelphia           | -0.29% (-0.6%–0.02%)                                           | 0.48% (0.09%–0.86%)    | 0.77% (0.28%–1.26%)                                    |
| C.S. Mott Children's Hospital                 | 0.13% (-0.64%–0.92%)                                           | 0.38% (-0.59%–1.34%)   | 0.24% (-1%–1.49%)                                      |

**eTable 3. Changes in the Monthly Proportion of Hospitalizations for Selected Mental Health Conditions Across Health Care Sites Between the Reference Prepandemic Period and the Examined Pandemic Period**

| Condition                  | Mean change in monthly proportion of hospitalizations (95% CI) |                        | ITS analysis: difference between time periods (95% CI) |
|----------------------------|----------------------------------------------------------------|------------------------|--------------------------------------------------------|
|                            | Prepandemic period                                             | During pandemic period |                                                        |
| Anxiety disorders          | 0.12% (-0.13%–0.37%)                                           | 0.55% (0.26%–0.84%)    | 0.43% (0.03%–0.81%)                                    |
| Depressive disorders       | 0.21% (-0.05%–0.45%)                                           | 0.50% (0.19%–0.79%)    | 0.29% (-0.1%–0.67%)                                    |
| Suicidality or self-injury | 0.05% (-0.2%–0.31%)                                            | 0.38% (0.08%–0.68%)    | 0.33% (-0.06%–0.72%)                                   |
| Eating disorders           | -0.01% (-0.28%–0.26%)                                          | 0.18% (-0.16%–0.49%)   | 0.18% (-0.24%–0.59%)                                   |

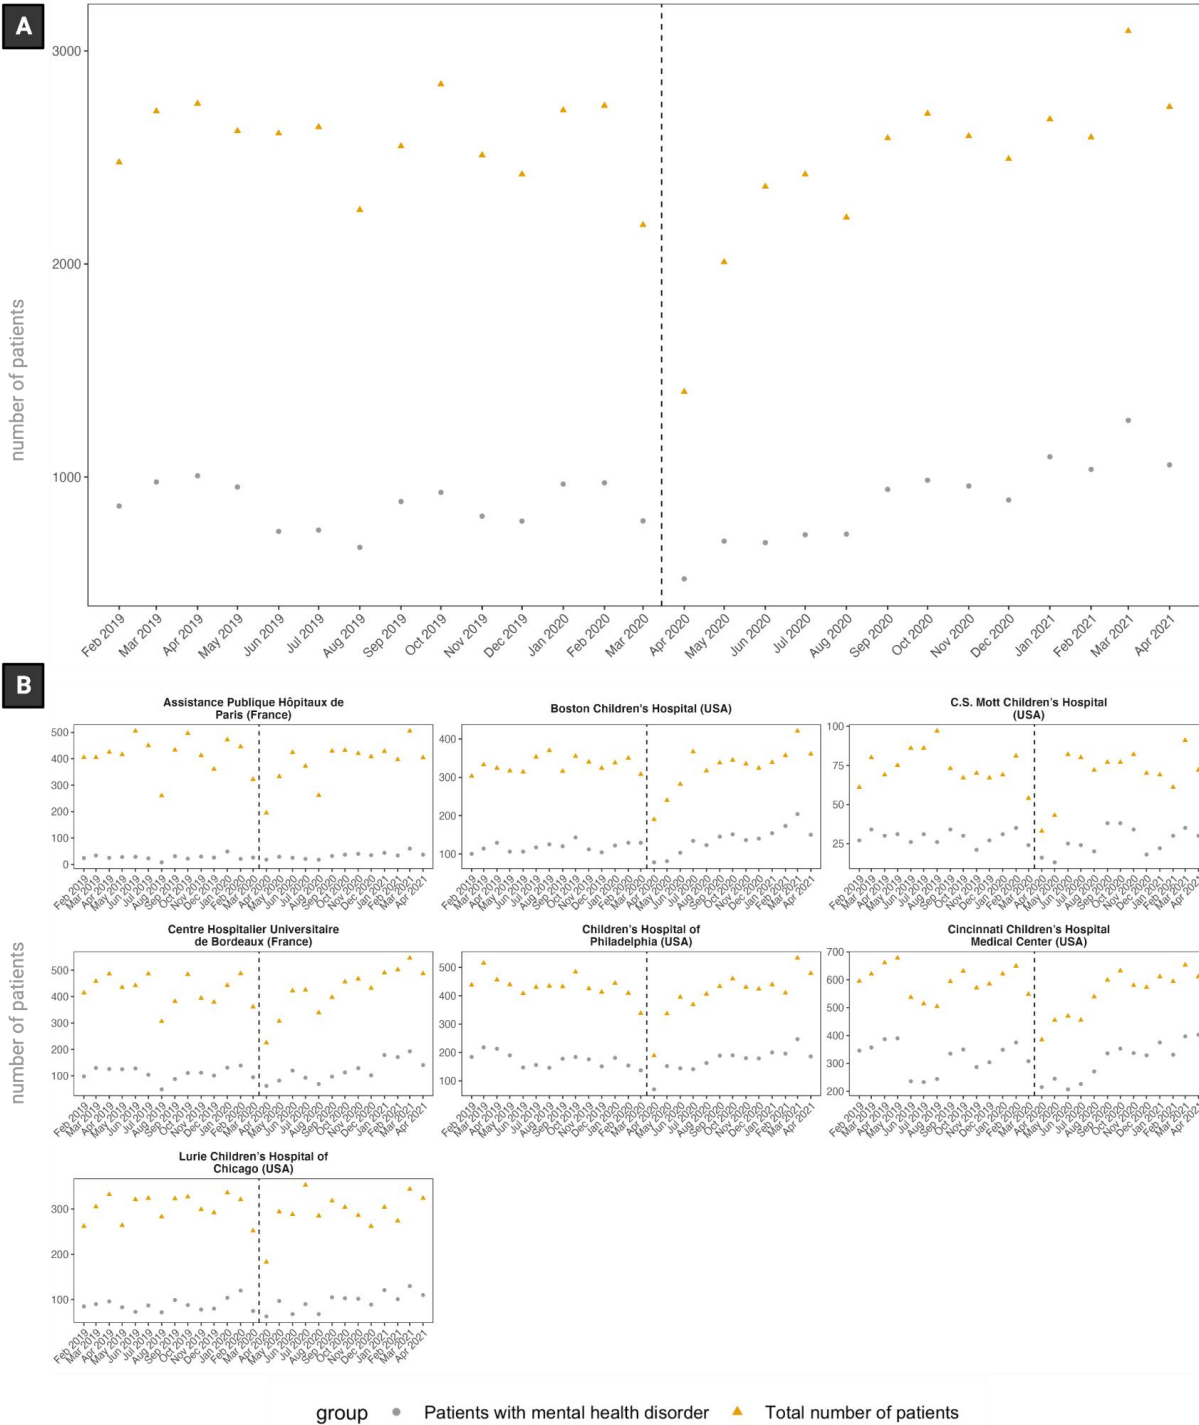

**eFigure 1. Number of hospitalizations per month.** Panel A shows the overall number of monthly hospitalizations with mental health conditions. Panel B shows the number of monthly hospitalizations with mental health conditions per contributing healthcare site. Data extracted from each site was systematically evaluated for irregular patterns in the total number of hospitalizations and number of hospitalizations associated with mental health conditions.

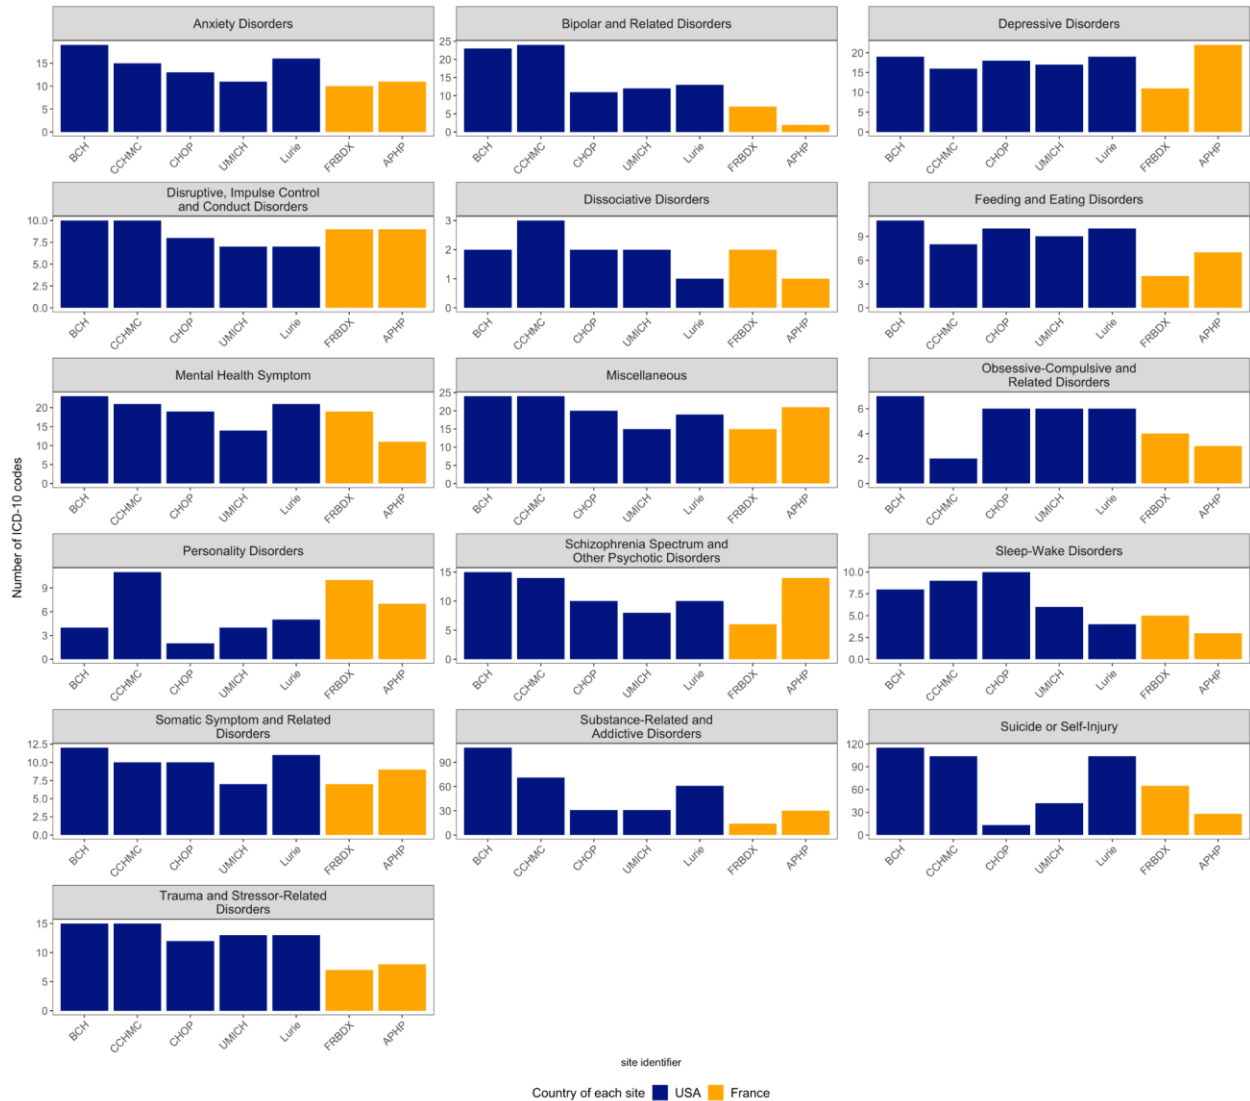

**eFigure 2. Use of ICD-10 codes by health care site.** Each panel shows the number of ICD-10 codes used by healthcare sites for each of the mental health condition groups. The use of specific ICD-10 codes was examined across healthcare sites and between countries to ensure consistent use of codes for the conditions of interest. This review revealed systematic differences in the use of ICD-10 codes between France and the US, mostly for suicidality and self-injury, requiring addition of a specific set of codes. After adjustment, the final number of ICD-10 codes entailed 1785 codes, among which 1449 were from the original Child and Adolescent Mental Health Disorders Classification System, and 336 were added to reflect French coding practice.

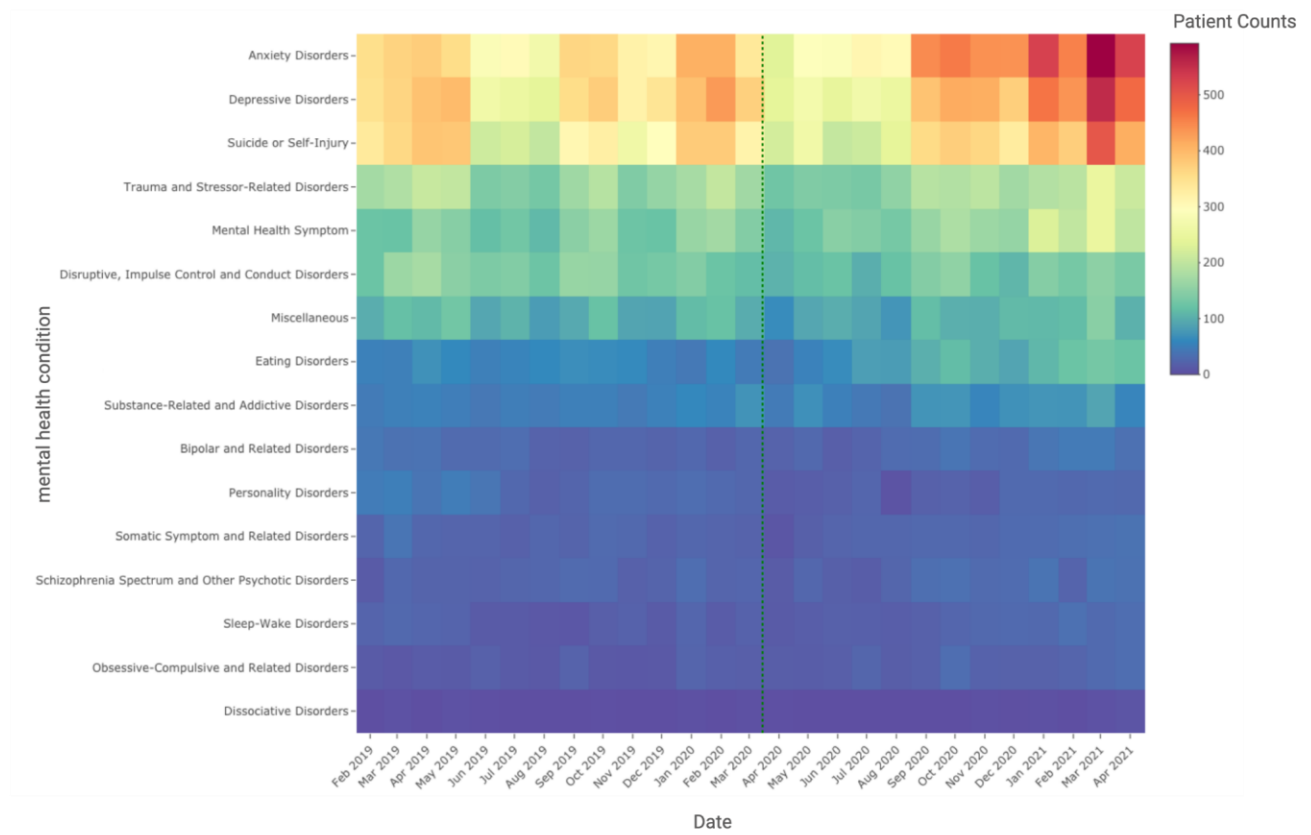

**eFigure 3. Counts of patients per month stratified by mental health condition.** The color of each cell represents the number of patients diagnosed with a given condition across the participating healthcare sites each month. The heatmap is sorted by frequency, from most to least common mental health condition groups.
