# Supplementary material for: Hospitalizations Associated With Mental Health Conditions Among Adolescents in the US and France During the COVID-19 Pandemic
Source: PubMed Central journal article supplement (PMC9856226; doi:10.1001/jamanetworkopen.2022.46548), 2022-12-13
Supplement: jamanetwopen-e2246548-s002.pdf [file jamanetwopen-e2246548-s002.pdf]

\*First name, last name, and suffix (if applicable) are required and will appear in PubMed.

| <b>*Group Name(s): The Consortium for Clinical Characterization of COVID-19 by EHR (4CE)</b> |                   |                              |                  |                                                                          |                                          |                                                         |                                                                                            |
|----------------------------------------------------------------------------------------------|-------------------|------------------------------|------------------|--------------------------------------------------------------------------|------------------------------------------|---------------------------------------------------------|--------------------------------------------------------------------------------------------|
| <b>*First Name and Middle Initial(s)</b>                                                     | <b>*Last Name</b> | <b>*Suffix (eg, Jr, III)</b> | Academic Degrees | Institution                                                              | Location (city, state/province, country) | Role or Contribution, eg, chair, principal investigator | Group (if more than 1 Group listed in the byline and/or Subgroup (eg, Steering Committee)) |
| James R                                                                                      | Aaron             |                              | MHA              | University of Kentucky                                                   | Lexington, KY, United States             | Member                                                  |                                                                                            |
| Giuseppe                                                                                     | Agapito           |                              | PhD              | University Magna Graecia of Catanzaro                                    | Catanzaro, Italy                         | Member                                                  |                                                                                            |
| Adem                                                                                         | Albayrak          |                              |                  | Health Catalyst, INC.                                                    | Cambridge, MA, United States             | Member                                                  |                                                                                            |
| Giuseppe                                                                                     | Albi              |                              | MS               | University of Pavia, Italy                                               | Pavia, Italy                             | Member                                                  |                                                                                            |
| Mario                                                                                        | Alessiani         |                              | MD, FACS         | ASST Pavia, Lombardia Region Health                                      | Pavia, Italy                             | Member                                                  |                                                                                            |
| Anna                                                                                         | Alloni            |                              | PhD              | BIOMERIS (BIOMedical Research Institute)                                 | Pavia, Italy                             | Member                                                  |                                                                                            |
| Danilo F                                                                                     | Amendola          |                              | MSc              | Clinical Research Unit of Botucatu Medical School                        | Botucatu, Brazil                         | Member                                                  |                                                                                            |
| François                                                                                     | Angoulvant        |                              | MD,PhD           | Hôpital Necker-Enfants Malades, Assistance Publique-Hopitaux de Paris    | Paris, France                            | Member                                                  |                                                                                            |
| Li L.L.J                                                                                     | Anthony           |                              |                  | National Center for Infectious Diseases                                  | Singapore, Singapore                     | Member                                                  |                                                                                            |
| Fatima                                                                                       | Ashraf            |                              | MS               | The University of Texas Health Science Center at Houston                 | Houston, TX, United States               | Member                                                  |                                                                                            |
| Andrew                                                                                       | Atz               |                              | MD               | Medical University of South Carolina                                     | Charleston, SC, United States            | Member                                                  |                                                                                            |
| Paula S                                                                                      | Azevedo           |                              | MD, PhD          | Botucatu Medical School, São Paulo                                       | Botucatu, Brazil                         | Member                                                  |                                                                                            |
| James                                                                                        | Balshi            |                              |                  | St. Luke's University Health Network                                     | Bethlehem, PA, United States             | Member                                                  |                                                                                            |
| Brett K                                                                                      | Beaulieu-Jones    |                              | PhD              | Harvard Medical School                                                   | Boston, MA, United States                | Member                                                  |                                                                                            |
| Douglas S                                                                                    | Bell              |                              |                  | David Geffen School of Medicine at University of California, Los Angeles | Los Angeles, CA, United States           | Member                                                  |                                                                                            |
| Antonio                                                                                      | Bellasi           |                              | MD, PhD          | Ente Ospedaliero Cantonale, Lugano                                       | Lugano, Switzerland                      | Member                                                  |                                                                                            |
| Riccardo                                                                                     | Bellazzi          |                              | MS, PhD          | University of Pavia, Italy                                               | Pavia, Italy                             | Member                                                  |                                                                                            |
| Vincent                                                                                      | Benoit            |                              | PhD              | APHP Greater Paris University Hospital                                   | Paris, France                            | Member                                                  |                                                                                            |
| Michele                                                                                      | Beraghi           |                              | MS               | ASST Pavia                                                               | Voghera, Italy                           | Member                                                  |                                                                                            |
| José Luis                                                                                    | Bernal-Sobrino    |                              | MS               | Hospital Universitario 12 de Octubre                                     | Madrid, Spain                            | Member                                                  |                                                                                            |
| Mérodie                                                                                      | Bernaux           |                              |                  | APHP Greater Paris University Hospital                                   | Paris, France                            | Member                                                  |                                                                                            |
| Romain                                                                                       | Bey               |                              |                  | APHP Greater Paris University Hospital                                   | Paris, France                            | Member                                                  |                                                                                            |
| Alvar                                                                                        | Blanco-Martínez   |                              | MS               | Hospital Universitario 12 de Octubre                                     | Madrid, Spain                            | Member                                                  |                                                                                            |
| Martin                                                                                       | Boeker            |                              |                  | Technical University of Munich                                           | Munich, Germany                          | Member                                                  |                                                                                            |
| John                                                                                         | Booth             |                              | MSc              | Great Ormond Street Hospital for Children                                | London, United Kingdom                   | Member                                                  |                                                                                            |
| Silvano                                                                                      | Bosari            |                              | Prof.            | IRCCS Ca' Granda Ospedale Maggiore                                       | Milan, Italy                             | Member                                                  |                                                                                            |
| Robert L                                                                                     | Bradford          |                              |                  | North Carolina Translational and Clinical Research Institute             | Chapel Hill, NC, United States           | Member                                                  |                                                                                            |
| Gabriel A                                                                                    | Brat              |                              | MD               | Harvard Medical School                                                   | Boston, MA, United States                | Member                                                  |                                                                                            |
| Stéphane                                                                                     | Bréant            |                              |                  | APHP Greater Paris University Hospital                                   | Paris, France                            | Member                                                  |                                                                                            |

## Supplemental Online Content: Nonauthor Collaborators

\*First name, last name, and suffix (if applicable) are required and will appear in PubMed.

| *First Name and Middle Initial(s) | *Last Name    | *Suffix (eg, Jr, III) | Academic Degrees | Institution                                        | Location (city, state/province, country) | Role or Contribution, eg, chair, principal investigator | Group (if more than 1 Group listed in the byline and/or Subgroup (eg, Steering Committee) |
|-----------------------------------|---------------|-----------------------|------------------|----------------------------------------------------|------------------------------------------|---------------------------------------------------------|-------------------------------------------------------------------------------------------|
| Nicholas W                        | Brown         |                       | MEng             | Harvard Medical School                             | Boston, MA, United States                | Member                                                  |                                                                                           |
| Raffaele                          | Bruno         |                       | MD               | Fondazione I.R.C.C.S. Policlinico San Matteo       | Pavia, Italy                             | Member                                                  |                                                                                           |
| William A                         | Bryant        |                       | PhD              | Great Ormond Street Hospital for Children          | London, United Kingdom                   | Member                                                  |                                                                                           |
| Mauro                             | Bucalo        |                       | MS               | BIOMERIS (BIOMedical Research Institute)           | Pavia, Italy                             | Member                                                  |                                                                                           |
| Emily                             | Bucholz       |                       | MD, PhD, M       | Boston Children's Hospital, Harvard Medical School | Boston, MA, United States                | Member                                                  |                                                                                           |
| Anita                             | Burgun        |                       |                  | APHP Greater Paris University Hospital             | Paris, France                            | Member                                                  |                                                                                           |
| Mario                             | Cannataro     |                       | M.Sc.            | University Magna Graecia of Catanzaro              | Catanzaro, Italy                         | Member                                                  |                                                                                           |
| Aldo                              | Carmona       |                       |                  | St. Luke's University Health Network               | Bethlehem, PA, United States             | Member                                                  |                                                                                           |
| Charlotte                         | Caucheteux    |                       |                  | Université Paris-Saclay, Inria, CEA                | Palaiseau, France                        | Member                                                  |                                                                                           |
| Julien                            | Champ         |                       |                  | INRIA Sophia-Antipolis – ZENITH team               | Montpellier, France                      | Member                                                  |                                                                                           |
| Jin                               | Chen          |                       | PhD              | University of Kentucky                             | Lexington, KY, United States             | Member                                                  |                                                                                           |
| Krista Y                          | Chen          |                       | BS               | Boston Children's Hospital                         | Boston, MA, United States                | Member                                                  |                                                                                           |
| Luca                              | Chiovato      |                       | MD, PhD          | Istituti Clinici Scientifici Maugeri SpA           | Pavia, Italy                             | Member                                                  |                                                                                           |
| Lorenzo                           | Chiudinelli   |                       | PhD              | ASST Papa Giovanni XXIII, Bergamo                  | Bergamo, Italy                           | Member                                                  |                                                                                           |
| Kelly                             | Cho           |                       | PhD, MPH         | VA Boston Healthcare System                        | Boston, MA, United States                | Member                                                  |                                                                                           |
| James J                           | Cimino        |                       | MD               | University of Alabama at Birmingham                | Birmingham, AL, United States            | Member                                                  |                                                                                           |
| Tiago K                           | Colicchio     |                       | PhD, MBA         | University of Alabama at Birmingham                | Birmingham, AL, United States            | Member                                                  |                                                                                           |
| Sylvie                            | Cormont       |                       |                  | APHP Greater Paris University Hospital             | Paris, France                            | Member                                                  |                                                                                           |
| Sébastien                         | Cossin        |                       |                  | Bordeaux University Hospital / ERIAS               | Bordeaux, France                         | Member                                                  |                                                                                           |
| Jean B                            | Craig         |                       | PhD              | Medical University of South Carolina               | Charleston, SC, United States            | Member                                                  |                                                                                           |
| Juan Luis                         | Cruz-Bermúdez |                       | PhD              | Hospital Universitario 12 de Octubre               | Madrid, Spain                            | Member                                                  |                                                                                           |
| Jaime                             | Cruz-Rojo     |                       | MD               | Hospital Universitario 12 de Octubre               | Madrid, Spain                            | Member                                                  |                                                                                           |
| Arianna                           | Dagliati      |                       | MS, PhD          | University of Pavia, Italy                         | Pavia, Italy                             | Member                                                  |                                                                                           |
| Mohamad                           | Daniar        |                       | MSIS             | Boston Children's Hospital                         | Boston, MA, United States                | Member                                                  |                                                                                           |
| Christel                          | Daniel        |                       |                  | APHP Greater Paris University Hospital             | Paris, France                            | Member                                                  |                                                                                           |
| Priyam                            | Das           |                       | PhD              | Harvard Medical School                             | Boston, MA, United States                | Member                                                  |                                                                                           |
| Audrey                            | Dionne        |                       | MD               | Boston Children's Hospital, Harvard Medical School | Boston, MA, United States                | Member                                                  |                                                                                           |
| Rui                               | Duan          |                       | PhD              | Harvard T.H. Chan School of Public Health          | Boston, MA, United States                | Member                                                  |                                                                                           |
| Julien                            | Dubiel        |                       |                  | APHP Greater Paris University Hospital             | Paris, France                            | Member                                                  |                                                                                           |
| Scott L                           | DuVall        |                       | PhD              | VA Salt Lake City Health Care System               | Salt Lake City, United States            | Member                                                  |                                                                                           |
| Loic                              | Esteve        |                       |                  | SED/SIERRA, Inria Centre de Paris                  | Paris, France                            | Member                                                  |                                                                                           |

## Supplemental Online Content: Nonauthor Collaborators

\*First name, last name, and suffix (if applicable) are required and will appear in PubMed.

| *First Name and Middle Initial(s) | *Last Name        | *Suffix (eg, Jr, III) | Academic Degrees | Institution                            | Location (city, state/province, country) | Role or Contribution, eg, chair, principal investigator | Group (if more than 1 Group listed in the byline) and/or Subgroup (eg, Steering Committee) |
|-----------------------------------|-------------------|-----------------------|------------------|----------------------------------------|------------------------------------------|---------------------------------------------------------|--------------------------------------------------------------------------------------------|
| Hossein                           | Estiri            |                       | PhD              | Massachusetts General Hospital         | Boston, MA, United States                | Member                                                  |                                                                                            |
| Shirley                           | Fan               |                       |                  | University of Michigan                 | Ann Arbor, MI, United States             | Member                                                  |                                                                                            |
| Robert W                          | Follett           |                       | BS               | David Geffen School of Medicine at U   | Los Angeles, CA, United States           | Member                                                  |                                                                                            |
| Thomas                            | Ganslandt         |                       | MD               | University Medicine Mannheim, Heide    | Mannheim, Germany                        | Member                                                  |                                                                                            |
| Noelia                            | García-Barrio     |                       | MS               | Hospital Universitario 12 de Octubre,  | Madrid, Spain                            | Member                                                  |                                                                                            |
| Lana X                            | Garmire           |                       | PhD              | University of Michigan                 | Ann Arbor, MI, United States             | Member                                                  |                                                                                            |
| Nils                              | Gehlenborg        |                       |                  | Harvard Medical School                 | Boston, MA, United States                | Member                                                  |                                                                                            |
| Emily J                           | Getzen            |                       | MS               | Perelman School of Medicine at the U   | Philadelphia, PA, United States          | Member                                                  |                                                                                            |
| Alon                              | Geva              |                       | MD, MPH          | Boston Children's Hospital             | Boston, MA, United States                | Member                                                  |                                                                                            |
| Tomás                             | González González |                       | MD               | Hospital Universitario 12 de Octubre,  | Madrid, Spain                            | Member                                                  |                                                                                            |
| Tobias                            | Gradinger         |                       | MD, BSc          | University Medicine Mannheim, Heide    | Mannheim, Germany                        | Member                                                  |                                                                                            |
| Alexandre                         | Gramfort          |                       |                  | Université Paris-Saclay, Inria, CEA    | Palaiseau, France                        | Member                                                  |                                                                                            |
| Romain                            | Griffier          |                       |                  | Bordeaux University Hospital / ERIAS   | Bordeaux, France                         | Member                                                  |                                                                                            |
| Nicolas                           | Griffon           |                       |                  | APHP Greater Paris University Hospi    | Paris, France                            | Member                                                  |                                                                                            |
| Olivier                           | Grisel            |                       |                  | Université Paris-Saclay, Inria, CEA    | Palaiseau, France                        | Member                                                  |                                                                                            |
| Pietro H                          | Guzzi             |                       | PhD              | university of catanzaro department of  | Catanzaro, Italy                         | Member                                                  |                                                                                            |
| Larry                             | Han               |                       | PhD              | Harvard T.H. Chan School of Public H   | Boston, MA, United States                | Member                                                  |                                                                                            |
| Christian                         | Haverkamp         |                       | MD               | Faculty of Medicine and Medical Cen    | Freiburg, Germany                        | Member                                                  |                                                                                            |
| Derek Y                           | Hazard            |                       | MSc              | Institute of Medical Biometry and Stat | Freiburg, Germany                        | Member                                                  |                                                                                            |
| Bing                              | He                |                       | PhD              | University of Michigan                 | Ann Arbor, MI, United States             | Member                                                  |                                                                                            |
| Darren W                          | Henderson         |                       | BS               | University of Kentucky                 | Lexington, KY, United States             | Member                                                  |                                                                                            |
| Martin                            | Hilka             |                       |                  | APHP Greater Paris University Hospi    | Paris, France                            | Member                                                  |                                                                                            |
| Yuk-Lam                           | Ho                |                       | MPH              | VA Boston Healthcare System            | Boston, MA, United States                | Member                                                  |                                                                                            |
| John H                            | Holmes            |                       | MS, PhD          | University of Pennsylvania Perelman    | Philadelphia, PA, United States          | Member                                                  |                                                                                            |
| Chuan                             | Hong              |                       | PhD              | Duke University and Harvard Medical    | Durham, NC, United States                | Member                                                  |                                                                                            |
| Kenneth M                         | Huling            |                       | HS               | Harvard Medical School                 | Boston, MA, United States                | Member                                                  |                                                                                            |
| Richard W                         | Issitt            |                       | DClinP           | Great Ormond Street Hospital for Chi   | London, United Kingdom                   | Member                                                  |                                                                                            |
| Anne Sophie                       | Jannot            |                       |                  | HEGP, APHP Greater Paris Universit     | Paris, France                            | Member                                                  |                                                                                            |
| Vianney                           | Jouhet            |                       | MD, PhD          | Bordeaux University Hospital / ERIAS   | Bordeaux, France                         | Member                                                  |                                                                                            |
| Ramakanth                         | Kavuluru          |                       | PhD              | University of Kentucky                 | Lexington, KY, United States             | Member                                                  |                                                                                            |
| Mark S                            | Keller            |                       |                  | Harvard Medical School                 | Boston, MA, United States                | Member                                                  |                                                                                            |

## Supplemental Online Content: Nonauthor Collaborators

\*First name, last name, and suffix (if applicable) are required and will appear in PubMed.

| *First Name and Middle Initial(s) | *Last Name      | *Suffix (eg, Jr, III) | Academic Degrees | Institution                                            | Location (city, state/province, country) | Role or Contribution, eg, chair, principal investigator | Group (if more than 1 Group listed in the byline) and/or Subgroup (eg, Steering Committee) |
|-----------------------------------|-----------------|-----------------------|------------------|--------------------------------------------------------|------------------------------------------|---------------------------------------------------------|--------------------------------------------------------------------------------------------|
| Chris J                           | Kennedy         |                       | PhD              | Massachusetts General Hospital                         | Boston, MA, United States                | Member                                                  |                                                                                            |
| Kate F                            | Kernan          |                       | MD               | Children's Hospital of Pittsburgh                      | Pittsburgh, PA, United States            | Member                                                  |                                                                                            |
| Daniel A                          | Key             |                       | BEng             | Great Ormond Street Hospital for Children              | London, United Kingdom                   | Member                                                  |                                                                                            |
| Katie                             | Kirchoff        |                       | MShI             | Medical University of South Carolina                   | Charleston, SC, United States            | Member                                                  |                                                                                            |
| Jeffrey G                         | Klann           |                       | MEng, PhD        | Massachusetts General Hospital                         | Boston, MA, United States                | Member                                                  |                                                                                            |
| Isaac S                           | Kohane          |                       | MD, PhD          | Harvard Medical School                                 | Boston, MA, United States                | Member                                                  |                                                                                            |
| Ian D                             | Krantz          |                       |                  | The Children's Hospital of Philadelphia                | Philadelphia, PA, United States          | Member                                                  |                                                                                            |
| Detlef                            | Kraska          |                       | Dr.              | University Hospital Erlangen                           | Erlangen, Germany                        | Member                                                  |                                                                                            |
| Ashok K                           | Krishnamurthy   |                       | PhD              | University of North Carolina, Chapel Hill              | Chapel Hill, NC, United States           | Member                                                  |                                                                                            |
| Sehi                              | L'Yi            |                       | PhD              | Harvard Medical School                                 | Boston, MA, United States                | Member                                                  |                                                                                            |
| Trang T                           | Le              |                       | PhD              | University of Pennsylvania Perelman School of Medicine | Philadelphia, PA, United States          | Member                                                  |                                                                                            |
| Judith                            | Leblanc         |                       |                  | APHP Greater Paris University Hospital                 | Paris, France                            | Member                                                  |                                                                                            |
| Guillaume                         | Lemaitre        |                       |                  | Université Paris-Saclay, Inria, CEA                    | Palaiseau, France                        | Member                                                  |                                                                                            |
| Leslie                            | Lenert          |                       | MD, MS           | Medical University of South Carolina                   | Charleston, SC, United States            | Member                                                  |                                                                                            |
| Damien                            | Leprovost       |                       |                  | Clevy.io                                               | Paris, France                            | Member                                                  |                                                                                            |
| Molei                             | Liu             |                       | PhD              | Harvard T. H. Chan School of Public Health             | Boston, MA, United States                | Member                                                  |                                                                                            |
| Qi                                | Long            |                       | PhD              | University of Pennsylvania Perelman School of Medicine | Philadelphia, PA, United States          | Member                                                  |                                                                                            |
| Sara                              | Lozano-Zahonero |                       | PhD              | Faculty of Medicine and Medical Center                 | Freiburg, Germany                        | Member                                                  |                                                                                            |
| Kristine E                        | Lynch           |                       | PhD              | VA Salt Lake City Health Care System                   | Salt Lake City, UT, United States        | Member                                                  |                                                                                            |
| Sadiqa                            | Mahmood         |                       |                  | Health Catalyst, INC.                                  | Cambridge, MA, United States             | Member                                                  |                                                                                            |
| Sarah E                           | Maidlow         |                       | AA               | University of Michigan                                 | Ann Arbor, MI, United States             | Member                                                  |                                                                                            |
| Adeline                           | Makoudjou       |                       | MD               | Faculty of Medicine and Medical Center                 | Freiburg, Germany                        | Member                                                  |                                                                                            |
| Alberto                           | Malovini        |                       | PhD              | Istituti Clinici Scientifici Maugeri SpA               | Pavia, Italy                             | Member                                                  |                                                                                            |
| Kenneth D                         | Mandl           |                       | MD, MPH          | Boston Children's Hospital                             | Boston, MA, United States                | Member                                                  |                                                                                            |
| Chengsheng                        | Mao             |                       | PhD              | Northwestern University                                | Chicago, IL, United States               | Member                                                  |                                                                                            |
| Anupama                           | Maram           |                       | MS               | Harvard Medical School                                 | Boston, MA, United States                | Member                                                  |                                                                                            |
| Patricia                          | Martel          |                       |                  | APHP Greater Paris University Hospital                 | Boulogne-Billancourt, France             | Member                                                  |                                                                                            |
| Marcelo R                         | Martins         |                       | MSc              | Clinics hospital of the Botucatu Medical School        | Botucatu, Brazil                         | Member                                                  |                                                                                            |
| Jayson S                          | Marwaha         |                       | MD               | Beth Israel Deaconess Medical Center                   | Boston, MA, United States                | Member                                                  |                                                                                            |
| Aaron J                           | Masino          |                       | PhD              | Children's Hospital of Philadelphia                    | Philadelphia, PA, United States          | Member                                                  |                                                                                            |
| Maria                             | Mazzitelli      |                       | PhD              | University Magna Graecia of Catanzaro                  | Catanzaro, Italy                         | Member                                                  |                                                                                            |

## Supplemental Online Content: Nonauthor Collaborators

\*First name, last name, and suffix (if applicable) are required and will appear in PubMed.

| *First Name and Middle Initial(s) | *Last Name      | *Suffix (eg, Jr, III) | Academic Degrees | Institution                                                          | Location (city, state/province, country) | Role or Contribution, eg, chair, principal investigator | Group (if more than 1 Group listed in the byline) and/or Subgroup (eg, Steering Committee) |
|-----------------------------------|-----------------|-----------------------|------------------|----------------------------------------------------------------------|------------------------------------------|---------------------------------------------------------|--------------------------------------------------------------------------------------------|
| Arthur                            | Mensch          |                       |                  | ENS, PSL University                                                  | Paris, France                            | Member                                                  |                                                                                            |
| Marianna                          | Milano          |                       | PhD              | University Magna Graecia of Catanzaro                                | Catanzaro, Italy                         | Member                                                  |                                                                                            |
| Marcos F                          | Minicucci       |                       | MD, PhD          | Internal Medicine Department of Botucatu                             | Botucatu, Brazil                         | Member                                                  |                                                                                            |
| Jason H                           | Moore           |                       | PhD              | Cedars-Sinai Medical Center                                          | West Hollywood, CA, United States        | Member                                                  |                                                                                            |
| Cinta                             | Moraleda        |                       | MD, PhD          | Hospital Universitario 12 de Octubre                                 | Madrid, Spain                            | Member                                                  |                                                                                            |
| Jeffrey S                         | Morris          |                       |                  | University of Pennsylvania Perelman                                  | Berwyn, PA, United States                | Member                                                  |                                                                                            |
| Michele                           | Morris          |                       | BA               | University of Pittsburgh                                             | Pittsburgh, PA, United States            | Member                                                  |                                                                                            |
| Karyn L                           | Moshal          |                       |                  | Great Ormond Street Hospital for Children                            | London, United Kingdom                   | Member                                                  |                                                                                            |
| Sajad                             | Mousavi         |                       | PhD              | Harvard Medical School                                               | Boston, MA, United States                | Member                                                  |                                                                                            |
| Danielle L                        | Mowery          |                       | PhD              | University of Pennsylvania Perelman                                  | Philadelphia, PA, United States          | Member                                                  |                                                                                            |
| Douglas A                         | Murad           |                       |                  | David Geffen School of Medicine at UCLA                              | Los Angeles, CA, United States           | Member                                                  |                                                                                            |
| Shawn N                           | Murphy          |                       | MD, PhD          | Massachusetts General Hospital                                       | Boston, MA, United States                | Member                                                  |                                                                                            |
| Thomas P                          | Naughton        |                       | BA               | Harvard Medical School                                               | Boston, MA, United States                | Member                                                  |                                                                                            |
| Carlos Tadeu B                    | Neto            |                       |                  | Clinical Research Unit of Botucatu Medical School                    | Botucatu, Brazil                         | Member                                                  |                                                                                            |
| Antoine                           | Neuraz          |                       | MD, PhD          | Hôpital Necker-Enfants Malade, Assistance Publique-Hôpitaux de Paris | Paris, France                            | Member                                                  |                                                                                            |
| Jane                              | Newburger       |                       | MD, MPH          | Boston Children's Hospital, Harvard Medical School                   | Boston, MA, United States                | Member                                                  |                                                                                            |
| Kee Yuan                          | Ngiam           |                       | MBBS, FRCP       | National University Health System Singapore                          | Singapore, Singapore                     | Member                                                  |                                                                                            |
| James B                           | Norman          |                       |                  | Harvard Medical School                                               | Boston, MA, United States                | Member                                                  |                                                                                            |
| Jihad                             | Obeid           |                       | MD, FAMA         | Medical University of South Carolina                                 | Charleston, SC, United States            | Member                                                  |                                                                                            |
| Marina P                          | Okoshi          |                       | PhD              | Internal Medicine Department of Botucatu                             | Botucatu, Brazil                         | Member                                                  |                                                                                            |
| Karen L                           | Olson           |                       | PhD              | Boston Children's Hospital and Harvard Medical School                | Boston, MA, United States                | Member                                                  |                                                                                            |
| Nina                              | Orlova          |                       |                  | APHP Greater Paris University Hospital                               | Paris, France                            | Member                                                  |                                                                                            |
| Brian D                           | Ostasiewski     |                       | BS               | Wake Forest School of Medicine                                       | Winston Salem, NC, United States         | Member                                                  |                                                                                            |
| Nathan P                          | Palmer          |                       | PhD              | Harvard Medical School                                               | Boston, MA, United States                | Member                                                  |                                                                                            |
| Nicolas                           | Paris           |                       |                  | APHP Greater Paris University Hospital                               | Paris, France                            | Member                                                  |                                                                                            |
| Lav P                             | Patel           |                       | MS               | University Of Kansas Medical Center                                  | Kansas City, KS, United States           | Member                                                  |                                                                                            |
| Miguel                            | Pedrerá-Jiménez |                       | MS               | Hospital Universitario 12 de Octubre                                 | Madrid, Spain                            | Member                                                  |                                                                                            |
| Ashley C                          | Pfaff           |                       | MD               | Beth Israel Deaconess Medical Center                                 | Boston, MA, United States                | Member                                                  |                                                                                            |
| Emily R                           | Pfaff           |                       | PhD              | UNC Chapel Hill                                                      | Chapel Hill, NC, United States           | Member                                                  |                                                                                            |
| Danielle                          | Pillion         |                       | MS               | Harvard Medical School                                               | Boston, MA, United States                | Member                                                  |                                                                                            |
| Sara                              | Pizzimenti      |                       | MS               | IRCCS Ca' Granda Ospedale Maggiore                                   | Milan, Italy                             | Member                                                  |                                                                                            |

## Supplemental Online Content: Nonauthor Collaborators

\*First name, last name, and suffix (if applicable) are required and will appear in PubMed.

| *First Name and Middle Initial(s) | *Last Name           | *Suffix (eg, Jr, III) | Academic Degrees | Institution                                         | Location (city, state/province, country) | Role or Contribution, eg, chair, principal investigator | Group (if more than 1 Group listed in the byline) and/or Subgroup (eg, Steering Committee) |
|-----------------------------------|----------------------|-----------------------|------------------|-----------------------------------------------------|------------------------------------------|---------------------------------------------------------|--------------------------------------------------------------------------------------------|
| Tanu                              | Priya                |                       | BS               | Northwestern University Feinberg School of Medicine | Chicago, IL, United States               | Member                                                  |                                                                                            |
| Hans U                            | Prokosch             |                       |                  | University of Erlangen-Nürnberg                     | Erlangen, Germany                        | Member                                                  |                                                                                            |
| Robson A                          | Prudente             |                       | PhD              | Clinical Research Unit São Paulo State University   | Botucatu, Brazil                         | Member                                                  |                                                                                            |
| Andrea                            | Prunotto             |                       | PhD              | Faculty of Medicine and Medical Center              | Freiburg, Germany                        | Member                                                  |                                                                                            |
| Víctor                            | Quirós-González      |                       | MS               | Hospital Universitario 12 de Octubre                | Madrid, Spain                            | Member                                                  |                                                                                            |
| Rachel B                          | Ramoni               |                       |                  | Department of Veterans Affairs                      | Washington, DC, D.C., United States      | Member                                                  |                                                                                            |
| Maryna                            | Raskin               |                       |                  | Health Catalyst, INC.                               | Cambridge, MA, United States             | Member                                                  |                                                                                            |
| Siegbert                          | Rieg                 |                       | MD               | Medical Center – University of Freiburg             | Freiburg, Germany                        | Member                                                  |                                                                                            |
| Gustavo                           | Roig-Domínguez       |                       | MS               | Hospital Universitario 12 de Octubre                | Madrid, Spain                            | Member                                                  |                                                                                            |
| Pablo                             | Rojo                 |                       | MD, PhD          | Hospital Universitario 12 de Octubre                | Madrid, Spain                            | Member                                                  |                                                                                            |
| Paula                             | Rubio-Mayo           |                       | MS               | Hospital Universitario 12 de Octubre                | Madrid, Spain                            | Member                                                  |                                                                                            |
| Paolo                             | Sacchi               |                       | MD               | Fondazione I.R.C.C.S. Policlinico Sario             | Pavia, Italy                             | Member                                                  |                                                                                            |
| Elisa                             | Salamanca            |                       |                  | APHP Greater Paris University Hospital              | Paris, France                            | Member                                                  |                                                                                            |
| Malarkodi Jebathilagan            | Samayamuthu          |                       | MD               | University of Pittsburgh                            | Pittsburgh, PA, United States            | Member                                                  |                                                                                            |
| Arnaud                            | Sandrin              |                       |                  | APHP Greater Paris University Hospital              | Paris, France                            | Member                                                  |                                                                                            |
| Nandhini                          | Santhanam            |                       | MSc              | University Medicine Mannheim, Heidelberg            | Mannheim, Germany                        | Member                                                  |                                                                                            |
| Janaina CC                        | Santos               |                       | MS               | Clinical Research Unit of Botucatu Medical Center   | Botucatu, Brazil                         | Member                                                  |                                                                                            |
| Fernando J                        | Sanz Vidorreta       |                       |                  | David Geffen School of Medicine at UCLA             | Los Angeles, CA, United States           | Member                                                  |                                                                                            |
| Maria                             | Savino               |                       | MS               | Management Engineer, Direction                      | Pavia, Italy                             | Member                                                  |                                                                                            |
| Emily R                           | Schriner             |                       | MS               | University of Pennsylvania Health System            | Philadelphia, PA, United States          | Member                                                  |                                                                                            |
| Petra                             | Schubert             |                       | MPH              | VA Boston Healthcare System                         | Boston, MA, United States                | Member                                                  |                                                                                            |
| Juergen                           | Schuetzler           |                       |                  | University Hospital Erlangen, FAU Erlangen          | Erlangen, Germany                        | Member                                                  |                                                                                            |
| Luigia                            | Scudeller            |                       | MD, MSc          | IRCCS Ca' Granda Ospedale Maggiore                  | Milan, Italy                             | Member                                                  |                                                                                            |
| Neil J                            | Sebire               |                       | MD, FRCP         | Great Ormond Street Hospital for Children           | London, United Kingdom                   | Member                                                  |                                                                                            |
| Pablo                             | Serrano-Balazote     |                       | MD, MS           | Hospital Universitario 12 de Octubre                | Madrid, Spain                            | Member                                                  |                                                                                            |
| Patricia                          | Serre                |                       |                  | APHP Greater Paris University Hospital              | Paris, France                            | Member                                                  |                                                                                            |
| Mohsin                            | Shah                 |                       | MSc              | Great Ormond Street Hospital for Children           | London, United Kingdom                   | Member                                                  |                                                                                            |
| Zahra                             | Shakeri Hossein Abad |                       | PhD              | University of Toronto                               | Toronto, Canada                          | Member                                                  |                                                                                            |
| Domenick                          | Silvio               |                       |                  | University of Michigan                              | Ann Arbor, MI, United States             | Member                                                  |                                                                                            |
| Piotr                             | Sliz                 |                       |                  | Boston Children's Hospital                          | Boston, MA, United States                | Member                                                  |                                                                                            |
| Jiyeon                            | Son                  |                       | MD               | University of Pittsburgh Medical Center             | Pittsburgh, PA, United States            | Member                                                  |                                                                                            |

## Supplemental Online Content: Nonauthor Collaborators

\*First name, last name, and suffix (if applicable) are required and will appear in PubMed.

| *First Name and Middle Initial(s) | *Last Name     | *Suffix (eg, Jr, III) | Academic Degrees | Institution                                  | Location (city, state/province, country) | Role or Contribution, eg, chair, principal investigator | Group (if more than 1 Group listed in the byline and/or Subgroup (eg, Steering Committee) |
|-----------------------------------|----------------|-----------------------|------------------|----------------------------------------------|------------------------------------------|---------------------------------------------------------|-------------------------------------------------------------------------------------------|
| Charles                           | Sonday         |                       |                  | St. Luke's University Health Network,        | Bethlehem, PA, United States             | Member                                                  |                                                                                           |
| Anastasia                         | Spiridou       |                       | PhD              | Great Ormond Street Hospital for Children    | London, United Kingdom                   | Member                                                  |                                                                                           |
| Zachary H                         | Strasser       |                       | MD               | Massachusetts General Hospital               | Boston, MA, United States                | Member                                                  |                                                                                           |
| Bryce WQ                          | Tan            |                       | MBBS             | National University Hospital, Singapore      | Singapore, Singapore                     | Member                                                  |                                                                                           |
| Byorn WL                          | Tan            |                       | MBBS             | National University Hospital, Singapore      | Singapore, Singapore                     | Member                                                  |                                                                                           |
| Suzana E                          | Tanni          |                       | PhD              | Internal Medicine Department of Botucatu     | Botucatu, Brazil                         | Member                                                  |                                                                                           |
| Ana I                             | Terriza-Torres |                       | MS               | Hospital Universitario 12 de Octubre,        | Madrid, Spain                            | Member                                                  |                                                                                           |
| Valentina                         | Tibollo        |                       | MS               | Istituti Clinici Scientifici Maugeri SpA     | Pavia, Italy                             | Member                                                  |                                                                                           |
| Patric                            | Tippmann       |                       | MSc              | Institute of Medical Biometry and Statistics | Freiburg, Germany                        | Member                                                  |                                                                                           |
| Emma MS                           | Toh            |                       |                  | National University of Singapore             | Singapore, Singapore                     | Member                                                  |                                                                                           |
| Carlo                             | Torti          |                       | PhD              | University Magna Graecia of Catanzaro        | Catanzaro, Italy                         | Member                                                  |                                                                                           |
| Enrico M                          | Trecarichi     |                       | PhD              | University Magna Graecia of Catanzaro        | Catanzaro, Italy                         | Member                                                  |                                                                                           |
| Andrew K                          | Vallejos       |                       |                  | Clinical & Translational Science Institute   | Milwaukee, WI, United States             | Member                                                  |                                                                                           |
| Gael                              | Varoquaux      |                       |                  | Université Paris-Saclay, Inria, CEA, M       | Palaiseau, France                        | Member                                                  |                                                                                           |
| Margaret E                        | Vella          |                       | MPH              | Harvard Medical School                       | Boston, MA, United States                | Member                                                  |                                                                                           |
| Jill-Jênn                         | Vie            |                       |                  | SequeL, Inria Lille                          | Villeneuve-d'Ascq, France                | Member                                                  |                                                                                           |
| Michele                           | Vitacca        |                       | MD, PhD          | ICS S. Maugeri IRCCS Pavia Italy             | Lumezzane (Bs), Italy                    | Member                                                  |                                                                                           |
| Kavishwar B                       | Waghlikar      |                       | MBBS, PhD        | Massachusetts General Hospital               | Boston, MA, United States                | Member                                                  |                                                                                           |
| Lemuel R                          | Waitman        |                       |                  | University of Missouri, Columbia. MO         | Columbia, MO, United States              | Member                                                  |                                                                                           |
| Xuan                              | Wang           |                       | PhD              | Harvard Medical School                       | Boston, MA, United States                | Member                                                  |                                                                                           |
| Demian                            | Wassermann     |                       |                  | Université Paris-Saclay, Inria, CEA          | Palaiseau, France                        | Member                                                  |                                                                                           |
| Griffin M                         | Weber          |                       | MD, PhD          | Harvard Medical School                       | Boston, MA, United States                | Member                                                  |                                                                                           |
| Martin                            | Wolkewitz      |                       | PhD              | Institute of Medical Biometry and Statistics | Freiburg, Germany                        | Member                                                  |                                                                                           |
| Scott                             | Wong           |                       |                  | National University Hospital, Singapore      | Singapore, Singapore                     | Member                                                  |                                                                                           |
| Xin                               | Xiong          |                       | MS               | Harvard T.H. Chan School of Public Health    | Boston, MA, United States                | Member                                                  |                                                                                           |
| Ye                                | Ye             |                       | BMED, MS         | University of Pittsburgh                     | Pittsburgh, PA, United States            | Member                                                  |                                                                                           |
| Nadir                             | Yehya          |                       | MD, MSCE         | Children's Hospital of Philadelphia and      | Philadelphia, PA, United States          | Member                                                  |                                                                                           |
| William                           | Yuan           |                       | PhD              | Harvard Medical School                       | Boston, MA, United States                | Member                                                  |                                                                                           |
| Alberto                           | Zambelli       |                       |                  | ASST Papa Giovanni XXIII, Bergamo            | Bergamo, Italy                           | Member                                                  |                                                                                           |
| Harrison G                        | Zhang          |                       | HSDG             | Harvard Medical School                       | Boston, MA, United States                | Member                                                  |                                                                                           |
| Daniela                           | Zöller         |                       | PhD              | Faculty of Medicine and Medical Center       | Freiburg, Germany                        | Member                                                  |                                                                                           |

Supplemental Online Content: Nonauthor Collaborators

\*First name, last name, and suffix (if applicable) are required and will appear in PubMed.

| *First Name and Middle Initial(s) | *Last Name | *Suffix (eg, Jr, III) | Academic Degrees | Institution                           | Location (city, state/province, country) | Role or Contribution, eg, chair, principal investigator | Group (if more than 1 Group listed in the byline) and/or Subgroup (eg, Steering Committee) |
|-----------------------------------|------------|-----------------------|------------------|---------------------------------------|------------------------------------------|---------------------------------------------------------|--------------------------------------------------------------------------------------------|
| Valentina                         | Zuccaro    |                       | MD               | Fondazione I.R.C.C.S. Policlinico Sar | Pavia, Italy                             | Member                                                  |                                                                                            |
| Chiara                            | Zucco      |                       | PhD              | University Magna Graecia of Catanza   | Catanzaro, Italy                         | Member                                                  |                                                                                            |
|                                   |            |                       |                  |                                       |                                          |                                                         |                                                                                            |
