# Supplementary material for: Hospitalizations Associated With Mental Health Conditions Among Adolescents in the US and France During the COVID-19 Pandemic
Source: PubMed Central journal article supplement (PMC9856226; doi:10.1001/jamanetworkopen.2022.46548), 2022-12-13
Supplement: jamanetwopen-e2246548-s003.pdf [file jamanetwopen-e2246548-s003.pdf]

## Data Sharing Statement

Gutiérrez-Sacristán. Hospitalizations Associated With Mental Health Conditions Among Adolescents in the US and France During the COVID-19 Pandemic. *JAMA Netw Open*. Published December 13, 2022.  
doi:10.1001/jamanetworkopen.2022.46548

### Data

**Data available:** No

### Additional Information

**Explanation for why data not available:** Institutional Review Board from each hospital doesn't allow to share patient-level data outside the institution. The code was run locally at each site with meta-analysis centrally As described in the paper, we do share: Data Dictionary: [https://github.com/covidclinical/Phase2.2.psy\\_peds\\_trends/tree/main/public-data](https://github.com/covidclinical/Phase2.2.psy_peds_trends/tree/main/public-data)  
Code run at each site: [https://github.com/covidclinical/Phase2.2.psy\\_peds\\_trends/blob/main/psy\\_peds\\_3.Rmd](https://github.com/covidclinical/Phase2.2.psy_peds_trends/blob/main/psy_peds_3.Rmd)  
Metanalysis:  
[https://github.com/covidclinical/Phase2.2.psy\\_peds\\_trends/blob/main/metanalysis\\_visualization/manuscript\\_Figures.Rmd](https://github.com/covidclinical/Phase2.2.psy_peds_trends/blob/main/metanalysis_visualization/manuscript_Figures.Rmd)
